# Supplementary material for: The Use of Ascophyllum nodosum and Bacillus subtilis C-3102 in the Management of Canine Chronic Inflammatory Enteropathy: A Pilot Study
Source: MDPI journal article supplement (doi:10.3390/ani11123417), 2021-11-30
Supplement: s1 [file s1]

**Table S1.** Summary of the metadata of the 9 animals involved in the study.

|        |                   |        |     |               |        |     |                                             |                 | Timepoint d0 – Diet CTR |        | Timepoint d30 – Diet HP |        | Timepoint d60 – Diet HPA |        | Timepoint d90 – Diet HPAB |        |
|--------|-------------------|--------|-----|---------------|--------|-----|---------------------------------------------|-----------------|-------------------------|--------|-------------------------|--------|--------------------------|--------|---------------------------|--------|
| Dog ID | Breed             | Sex    | Age | Neuter status | Weight | BCS | Histopathological diagnosis                 | Disease subtype | Sample ID               | CIBDAI | Sample ID               | CIBDAI | Sample ID                | CIBDAI | Sample ID                 | CIBDAI |
|        |                   |        |     |               |        |     |                                             |                 |                         |        |                         |        |                          |        |                           |        |
| 1      | Crossbreed        | Male   | 7   | Castrated     | 34     | 5   | Moderate lymphocytic-plasmacytic enteritis  | IRE             | 480928F453190           | 5      | 480937F453199           | 3      | 480946F453208            | 4      | 464836F453187             | 1      |
| 2      | Pit Bull          | Male   | 3   | Castrated     | 18.35  | 4   | -                                           | ARE             | 480929F453191           | 4      | 480938F453200           | 4      | 480947F453209            | 3      | 464837F453188             | 2      |
| 3      | Crossbreed        | Male   | 5   | Castrated     | 29.8   | 7   | -                                           | ARE             | 480930F453192           | 4      | 480939F453201           | 3      | 480948F453210            | 2      | 480955F453217             | 2      |
| 4      | Italian Corso Dog | Male   | 5   | Castrated     | 38     | 5   | Moderate lymphocytic-plasmacytic duodenitis | IRE             | 480931F453193           | 7      | 480940F453202           | 5      | 480949F453211            | 4      | 480956F453218             | 3      |
| 5      | Crossbreed        | Male   | 3   | Castrated     | 30     | 6   | -                                           | ARE             | 480932F453194           | 4      | 480941F453203           | 2      | 480950F453212            | 2      | 480957F453219             | 3      |
| 6      | Crossbreed        | Female | 9   | Spayed        | 29.4   | 5   | -                                           | ARE             | 480933F453195           | 4      | 480942F453204           | 2      | 480951F453213            | 3      | 480958F453220             | 3      |
| 7      | American Bulldog  | Male   | 6   | Castrated     | 31.1   | 5   | -                                           | ARE             | 480934F453196           | 5      | 480943F453205           | 4      | 480952F453214            | 5      | 480959F453221             | 5      |
| 8      | Italian Corso Dog | Male   | 6   | Castrated     | 40.6   | 4   | -                                           | ARE             | 480935F453197           | 4      | 480944F453206           | 4      | 480953F453215            | 5      | 480960F453222             | 3      |
| 9      | Crossbreed        | Male   | 6   | Castrated     | 25.9   | 5   | Severe lymphocytic-plasmacytic duodenitis   | IRE             | 480936F453198           | 4      | 480945F453207           | 4      | 480954F453216            | 4      | 480961F453223             | 5      |
