# Supplementary material for: The Use of Ascophyllum nodosum and Bacillus subtilis C-3102 in the Management of Canine Chronic Inflammatory Enteropathy: A Pilot Study
Source: MDPI journal article supplement (doi:10.3390/ani11123417), 2021-11-30
Supplement: s1 [file s1]

Table S2. Statistical summary of data regarding faecal metabolites.

|                          | Dietary treatment |      |        |                     |      |      |        |                     |      |      |        |                     |      |      |        |                     |
|--------------------------|-------------------|------|--------|---------------------|------|------|--------|---------------------|------|------|--------|---------------------|------|------|--------|---------------------|
| Variable                 | CTR               |      |        |                     | HP   |      |        |                     | HPA  |      |        |                     | HPAB |      |        |                     |
|                          | Min               | Max  | Median | Interquartile Range | Min  | Max  | Median | Interquartile Range | Min  | Max  | Median | Interquartile Range | Min  | Max  | Median | Interquartile Range |
| CIBDAI                   | 4.0               | 7.0  | 4.0    | 1                   | 2.0  | 5.0  | 4.0    | 1                   | 2    | 5    | 4      | 1                   | 1    | 5    | 3      | 1                   |
| Acetic Acid (mmol/g)     | 0.18              | 2.07 | 0.85   | 0.29                | 0.52 | 2.69 | 1.02   | 0.17                | 0.57 | 4.21 | 0.97   | 1.28                | 0.72 | 2.69 | 1.28   | 1.04                |
| Acetone (mmol/g)         | 0.00              | 1.01 | 0.01   | 0.01                | 0.00 | 0.09 | 0.01   | 0.00                | 0.00 | 1.03 | 0.01   | 0.02                | 0.00 | 0.86 | 0.01   | 0.02                |
| Butyric Acid (mmol/g)    | 0.37              | 3.07 | 0.92   | 0.64                | 0.37 | 1.52 | 0.71   | 1.01                | 0.52 | 2.37 | 1.06   | 0.28                | 0.37 | 4.05 | 1.06   | 0.82                |
| Formic Acid (mmol/g)     | 0.05              | 1.39 | 0.75   | 0.85                | 0.02 | 1.52 | 0.72   | 0.67                | 0.02 | 2.09 | 0.63   | 0.85                | 0.09 | 1.06 | 0.28   | 0.57                |
| Indole (µg/g)            | 0.15              | 3.18 | 0.80   | 0.54                | 0.03 | 2.06 | 0.78   | 0.81                | 0.19 | 3.41 | 0.97   | 0.55                | 0.17 | 2.08 | 0.52   | 0.8                 |
| Isobutyric Acid (mmol/g) | 1.08              | 4.77 | 3.17   | 0.97                | 0.57 | 3.99 | 3.18   | 2.32                | 0.78 | 7.28 | 4.21   | 2.74                | 1.03 | 5.21 | 3.01   | 0.67                |
| Isovaleric Acid (mmol/g) | 0.96              | 7.02 | 2.39   | 2.02                | 0.77 | 5.02 | 2.29   | 1.85                | 0.63 | 8.54 | 3.14   | 3.4                 | 0.28 | 6.14 | 2.59   | 2.7                 |
| Lactic Acid (mmol/g)     | 0.06              | 0.28 | 0.21   | 0.06                | 0.05 | 0.81 | 0.21   | 0.05                | 0.05 | 0.63 | 0.28   | 0.2                 | 0.02 | 0.89 | 0.5    | 0.38                |
| Phenol (µg/g)            | 0.15              | 3.05 | 0.72   | 0.46                | 0.03 | 3.21 | 0.36   | 1.5                 | 0.13 | 3.04 | 0.64   | 1.91                | 0.13 | 3.10 | 0.92   | 0.84                |
| Propionic Acid (mmol/g)  | 0.09              | 2.26 | 0.51   | 0.58                | 0.07 | 1.05 | 0.52   | 0.03                | 0.03 | 1.09 | 0.28   | 0.57                | 0.02 | 2.29 | 0.51   | 0.58                |
| Skatole (µg/g)           | 0.16              | 2.16 | 0.52   | 0.78                | 0.24 | 2.01 | 0.98   | 0.34                | 0.21 | 2.16 | 0.89   | 0.72                | 0.19 | 2.39 | 1.22   | 1                   |
| Valeric Acid (mmol/g)    | 0.52              | 5.91 | 0.72   | 0.26                | 0.42 | 4.28 | 0.98   | 0.29                | 0.50 | 2.29 | 0.93   | 0.39                | 0.45 | 1.06 | 0.85   | 0.19                |

CTR: Control diet; HP: Hydrolysed protein diet; 2) HPA: *Ascophyllum nodosum*-supplemented HP diet; HPAB: *B. subtilis* C-3102 fortified HPA diet.
